# Supplementary material for: Cso, da un decennio al servizio dell' ortofrutticoltura
Source: publisher site journal article supplement (doi:10.1515/cclm-2022-1045), 2008-01-01
Supplement: Supplementary file 1 [file j_cclm-2022-1045_suppl_001.docx]

**Supplemental Figure 1.** Scatter plot analysis of tTG-IgA assays EliA Celikey IgA, Quanta Flash h-tTG IgA and Euroimmun ChLIA using the diagnostic CD cases and controls, for both adults and pediatric patients. For a better visualization, results above the upper measuring limit of EliA Celikey IgA, QUANTA Flash, and Euroimmun ChLIA were set to 1600 U/mL, 4965.5 CU, and 600 CU/mL, respectively. The red line indicates the ULN.
